# Supplementary material
Source: PubMed Central journal article supplement (PMC4525320)
Supplement: MCB.00397-15_zmb999100938so1.pdf [file MCB.00397-15_zmb999100938so1.pdf]

## SUPPLEMENTARY INFORMATION

### Construction of Vector control YFP plasmid.

YFP-control plasmid was generated by excising the SUMO-1 coding region from pEYFP-SUMO1 plasmid pEYFP-SUMO1(1), using the restriction enzymes BspE1 and XmaI that generate compatible ends that can be ligated together. The construct generated was confirmed by digestion and sequencing.

### Sequences of Real Time PCR primers used in the study

| Gene  | Primers                                                      |
|-------|--------------------------------------------------------------|
| Ubc-9 | 5' ATGGAGGAAAGACCACCCATTTG 3'<br>5' CCACGGAGTCCCTTTCTTTCC 3' |
| SENP1 | 5'CTCCAAC TCCCAGTTCTACTTTC 3'<br>5' GTTCTTCAATCTGGCGCAATC 3' |
| SENP2 | 5' AACTGGAGCCTGACCTATCA 3'<br>5' CGTCTTCTGTCCCTCTCTTTG 3'    |
| SENP3 | 5' TTGCAGCTGATCCAGTCTTAC 3'<br>5' TTGAGCCAGTTCTGTCCATAC 3'   |
| SENP5 | 5' GGGCCACTATTGTTACCTCAAA 3'<br>5' GGGACGCACAGAACCATAAA 3'   |
| SENP6 | 5' GAGGACCTGCACTGTCTAAAT 3'<br>5' GTCAGCGTCTTCCTTCTTCA 3'    |
| SENP7 | 5' TGGCTCTTGAAGTCCCTATCT 3'<br>5' GTGACGAGTCCATGTTCTTACTC 3' |
| GAPDH | 5' CCCTTCATTGACCTCAACTA 3'<br>5' CCAAAGTTGTCATGGATGAC 3'     |
| PIAS1 | 5' TGCCTTGACACCAAAC 3'<br>5' GCTTTGGTTCCACACCG 3'            |
| SAE2  | 5' TCTGGATACTATTGATGTAAG 3'<br>5' GGTAGGCAACGATATTAG 3'      |
| NFB1  | 5' TGGAGGAAGAGGCCAAAGAA 3'<br>5' GAAGCGCAGCCGCACTA 3'        |
| 18s   | 5'GAGGGACAAGTGGCGTTCA 3'<br>5'CCGGACATCTAAGGGCATCA 3'        |

### Reference List

1. Ayaydin, F. & Dasso, M. (2004) *Mol. Biol. Cell* **15**, 5208-5218.
